# Supplementary material
Source: PubMed Central journal article supplement (PMC2755887)

Supplemental Fig. S1

**A**

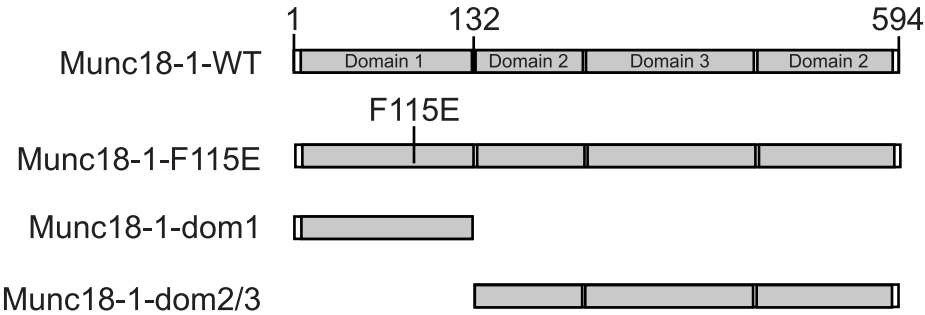

**B**

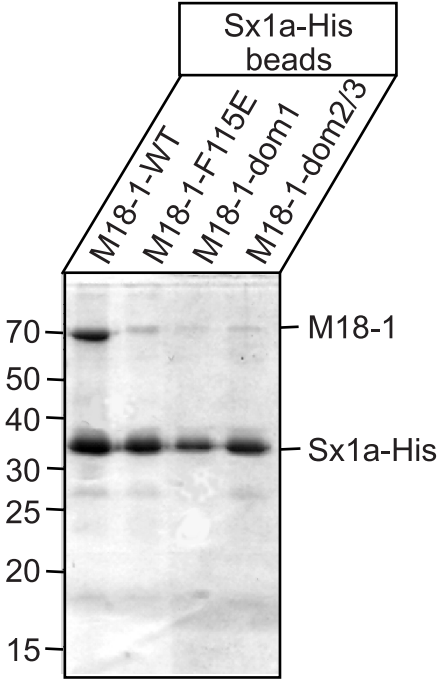

Supplement: supp_M109.013508_jbc.M109.013508-2.pdf [file supp_M109.013508_jbc.M109.013508-2.pdf]

Supplemental Fig. S2

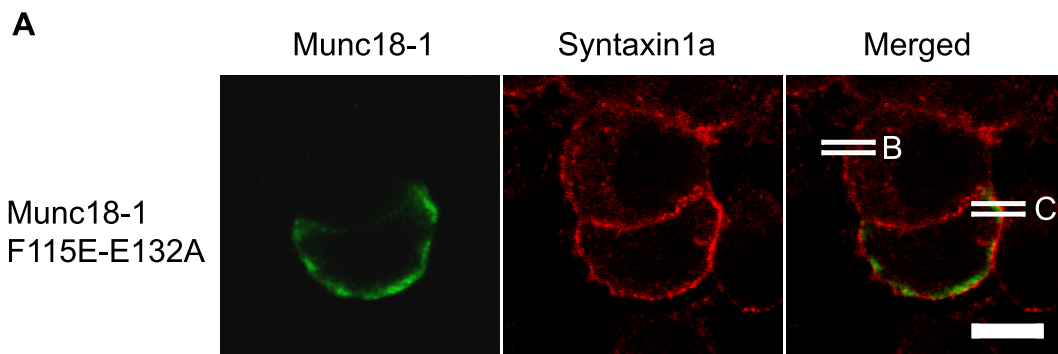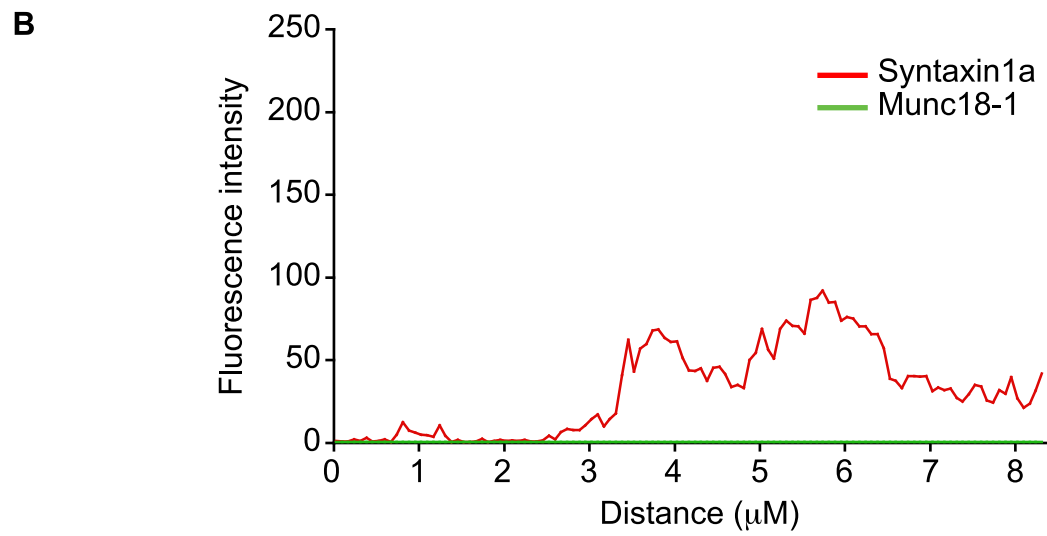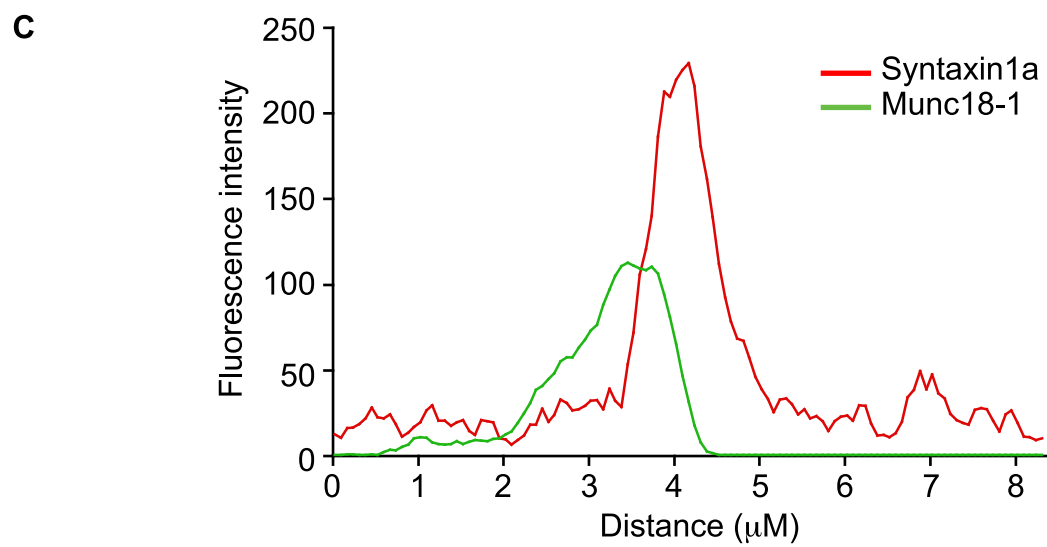

Supplement: supp_M109.013508_jbc.M109.013508-3.pdf [file supp_M109.013508_jbc.M109.013508-3.pdf]
